# Supplementary material for: Exploring the Effects of Various Two-Dimensional Supporting Materials on the Water Electrolysis of Co-Mo Sulfide/Oxide Heterostructure
Source: MDPI journal article supplement (doi:10.3390/nano13172463), 2023-08-31
Supplement: s1 [file s1]

## **Supporting information**

# **Exploring the Effects of Various Two-Dimensional Supporting Materials on the Water Electrolysis of Co-Mo Sulfide/Oxide Heterostructure**

**Ngoc-Diem Huynh, Won Mook Choi \* and Seung Hyun Hur \***

School of Chemical Engineering, University of Ulsan, Daehak-ro 93, Nam-gu, Ulsan 44610, Republic of Korea; diemhuynh0908@gmail.com

\* Correspondence: wmchoi98@ulsan.ac.kr (W.M.C.); shhur@ulsan.ac.kr (S.H.H.)

## Experimental

### *Chemicals*

Cobalt acetate ( $\text{Co}(\text{CH}_3\text{COO})_2 \cdot 4\text{H}_2\text{O}$ ), glycerol ( $\text{C}_3\text{H}_8\text{O}_3$ ), isopropanol ( $\text{C}_3\text{H}_8\text{O}$ ), ethanol ( $\text{C}_2\text{H}_6\text{O}$ ), and hydrazine monohydrate ( $\text{N}_2\text{H}_4 \cdot \text{H}_2\text{O}$ ) were purchased from Daejung chemicals. Thioacetamide (TAA) ( $\text{C}_2\text{H}_5\text{NS}$ ), ammonium molybdate tetrahydrate ( $(\text{NH}_4)_6\text{Mo}_7\text{O}_{24} \cdot 4\text{H}_2\text{O}$ ), melamine ( $\text{C}_3\text{H}_6\text{N}_6$ ), Nafion 5%, ruthenium oxide ( $\text{RuO}_2$ ), Pt/C 20%, and potassium hydroxide (KOH) were bought from Sigma-Aldrich. All of the chemicals were used without any purification after purchasing. Deionized water (DI) was used for all reactions.

### *Synthesis*

Co-glycerate precursor: In a typical synthesis procedure, 0.104 g of  $\text{Co}(\text{CH}_3\text{COO})_2 \cdot 4\text{H}_2\text{O}$  and 8 ml of glycerol were dissolved into 40 mL of  $\text{C}_3\text{H}_8\text{O}$  to form a transparent dark-green solution. The solution was then transferred to a Teflon-lined stainless-steel autoclave and kept at 180 °C for 6 h. After cooling to room temperature naturally, the purple precipitate was separated by filtration, washed several times with ethanol, and dried in an oven at 70 °C.

### *Material characterization*

A DXR Raman microscope (Thermo Scientific) was employed to obtain the Raman spectra for all samples; the range collected was from 100 to 1700  $\text{cm}^{-1}$ , with a 532 nm monochromatic excitation source. The X-ray diffraction (XRD) patterns were obtained by an A Rigaku X-ray diffractometer (D/MAZX 2500V/PC, Japan) with  $\text{Cu K}\alpha$  radiation (0.154 nm) and a scan range of 10-90°. The X-ray photoelectron spectroscopy (XPS) was performed on thermo ESCALAB 250 Xi, Thermo Fisher Scientific, USA, with  $\text{Al K}\alpha$  X-ray radiation (1486.6 eV). The morphology of materials was observed using field emission scanning electron microscopy (FESEM, Hitachi High-Tech Corporation, SU7000, Japan). The degas and nitrogen adsorption-desorption revealed the surface area and pore size of the samples, which were obtained using a Quantachrome Quadrasorb SI automated surface area and pore size analyzer.

### *Electrochemical measurement*

All electrochemical experiments were performed in an alkaline medium (1 M KOH) using a three-electrode system (BioLogic, Science Instruments) at room temperature. The system included a reference electrode (RE), a counter electrode (CE), and a working electrode (WE). In the system, the RE was a Hg/HgO electrode, the CE was a graphite rod, and carbon paper (CC) was the WE which was washed with ethanol and DI before use. To prepare the WE, 3mg of catalyst was added in 490  $\mu\text{L}$  of ethanol and 10  $\mu\text{L}$  of Nafion 5%, and then this mixture was sonicated for 30 minutes to obtain the homogeneous solution. Finally, 200  $\mu\text{L}$  of prepared solution was dropped on CC (1x1  $\text{cm}^2$ ), and the mass loading catalyst on CC was 1.2  $\text{mg}/\text{cm}^2$ . The RE was calibrated with respect to the reversible hydrogen electrode (RHE) in the system of Pt as WE and 1 M KOH saturated hydrogen. The electrode potential of Hg/HgO was 0.92 V at a current of 0 mA, as shown in **Fig. S11**. As a result, the formula to convert the potential of RE (Hg/HgO) to RHE was given by  $E_{\text{RHE}} = E_{\text{Hg/HgO}} + 0.92 \text{ (V)}$ . The linear sweep voltammetry (LSV) was carried out at 5 mV/s in the potential range of 1-1.72 V versus RHE. The electrochemical impedance spectroscopy (EIS) was obtained over a frequency range of 100 kHz to 0.1 Hz at 1.50 V vs RHE. The interface charge-transfer resistance ( $R_{\text{ct}}$ ) is equal to the diameter of the semicircle in the Nyquist plot. The cyclic voltammetry (CV) was run at 20, 40, 60, 80, and 100 mV/s in the range of 1.07-1.17 V to acquire the electrochemical double layer capacitance ( $C_{\text{dl}}$ ), which was the linear slope of the  $\Delta j = (j_{\text{a}} - j_{\text{c}})/2$  at 1.12 V versus different scan rates. The electrochemical surface area (ECSA) of catalysts was determined using  $\text{ECSA} = C_{\text{dl}}/C_{\text{s}}$ , where the specific capacitance  $C_{\text{s}}$  was 40  $\mu\text{F}/\text{cm}^2$  [1]. Chronoamperometry (CA) and Chronopotentiometry (CP) were conducted at 10  $\text{mA}/\text{cm}^2$ .

### **Figures and Tables**

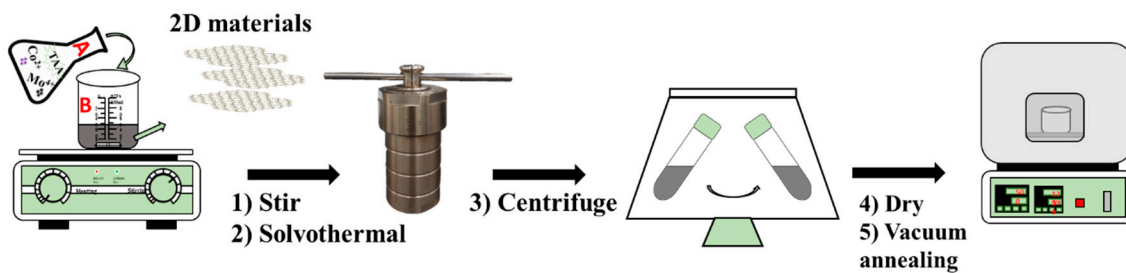

**Scheme S1:** The synthesis procedure of CMSO@2D

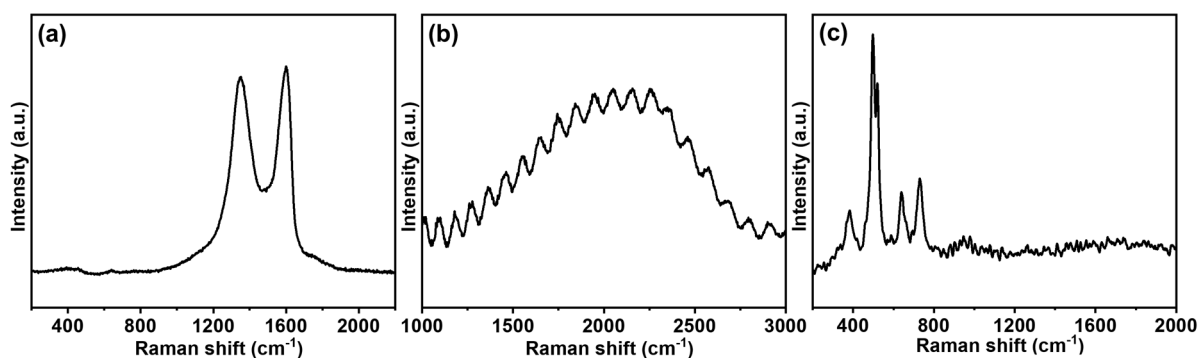

**Fig. S1:** Raman spectrum of (a) rGO, (b)  $\text{gC}_3\text{N}_4$ , and (c) SiSh

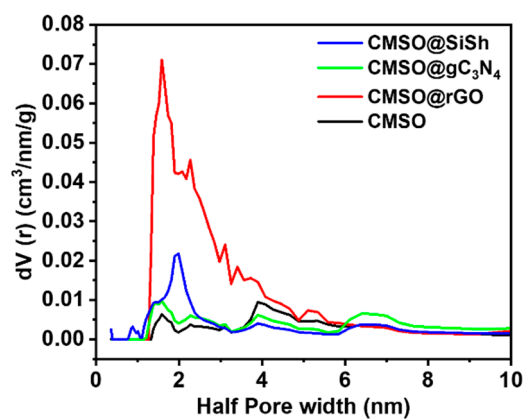

**Fig. S2:** Pore size distribution by density functional theory method of various materials

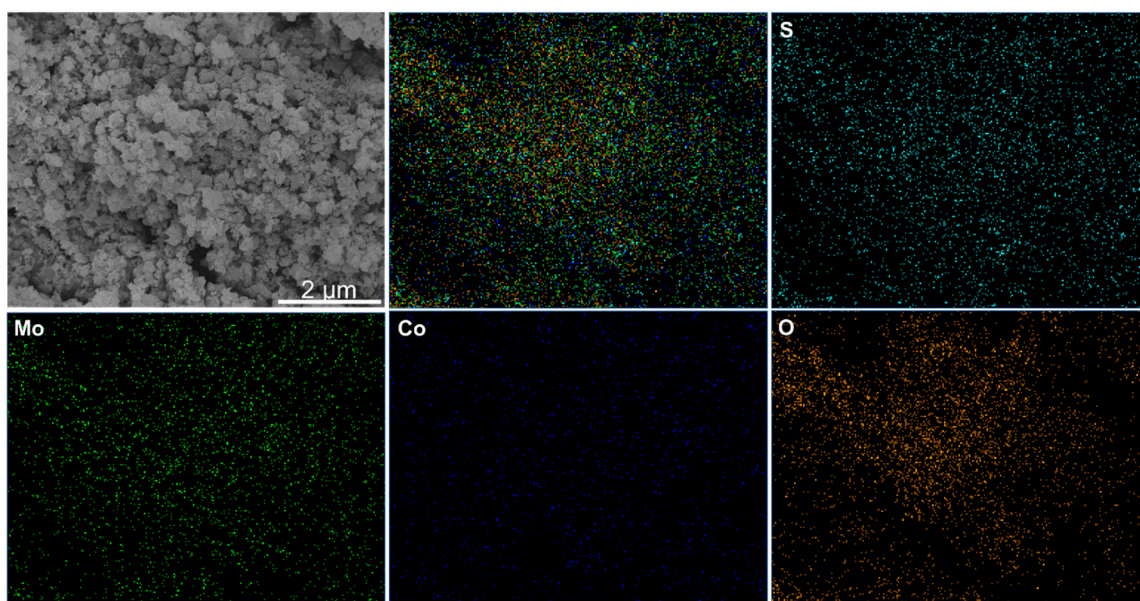

**Fig. S3:** Elemental mapping of CMSO

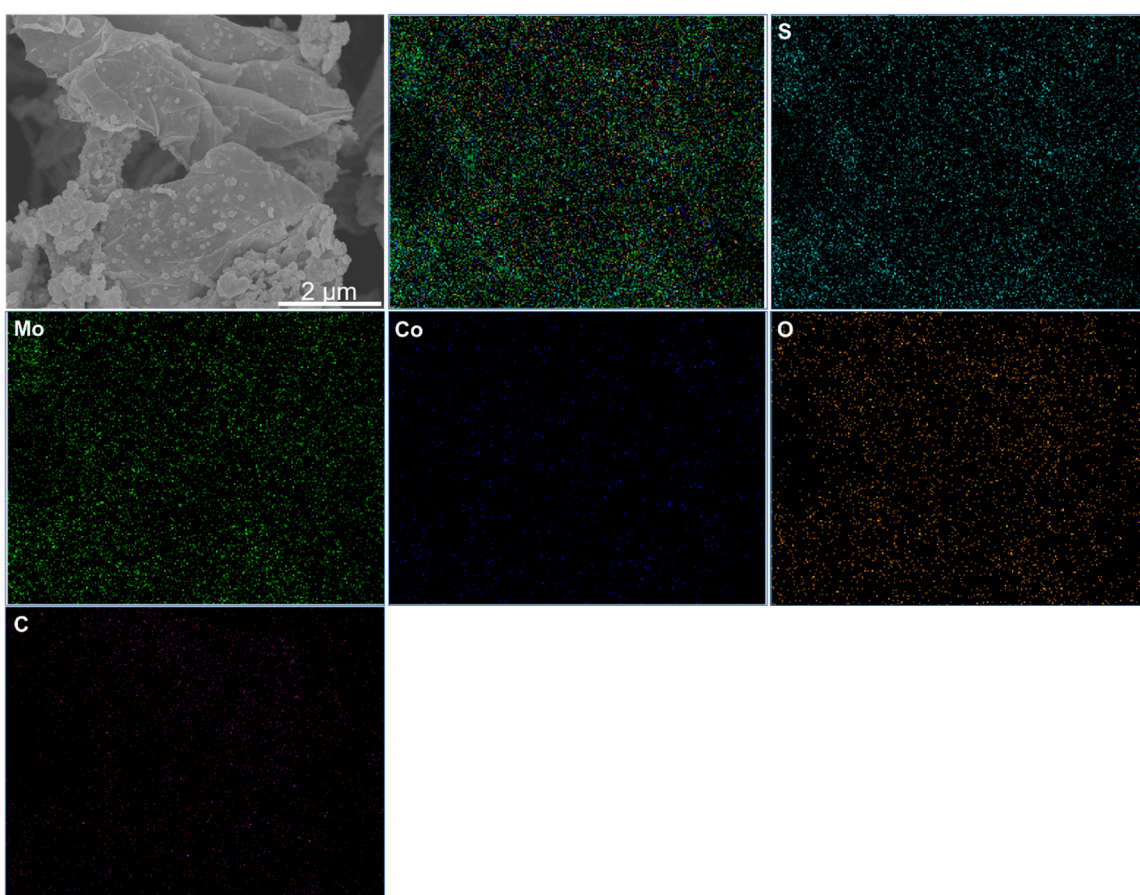

**Fig. S4:** Elemental mapping of CMSO@rGO

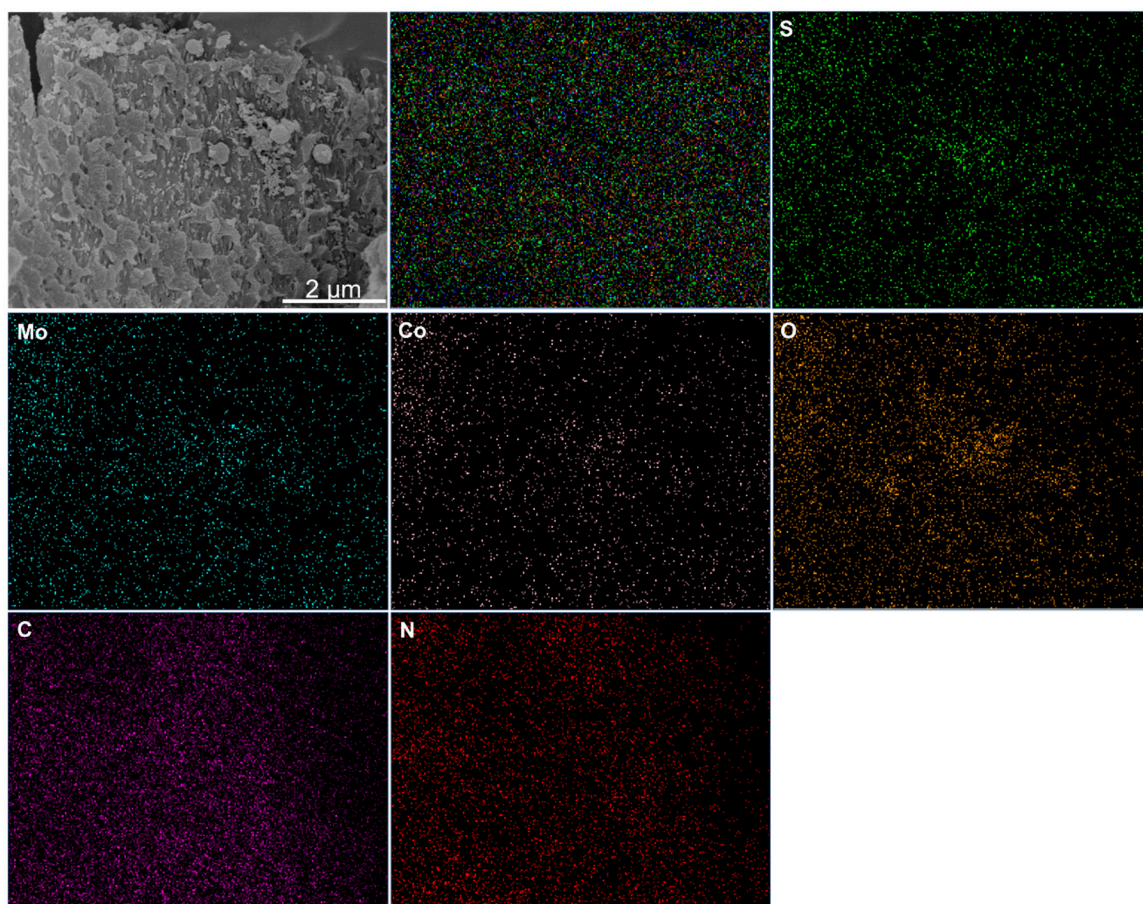

**Fig. S5:** Elemental mapping of CMSO@gC<sub>3</sub>N<sub>4</sub>



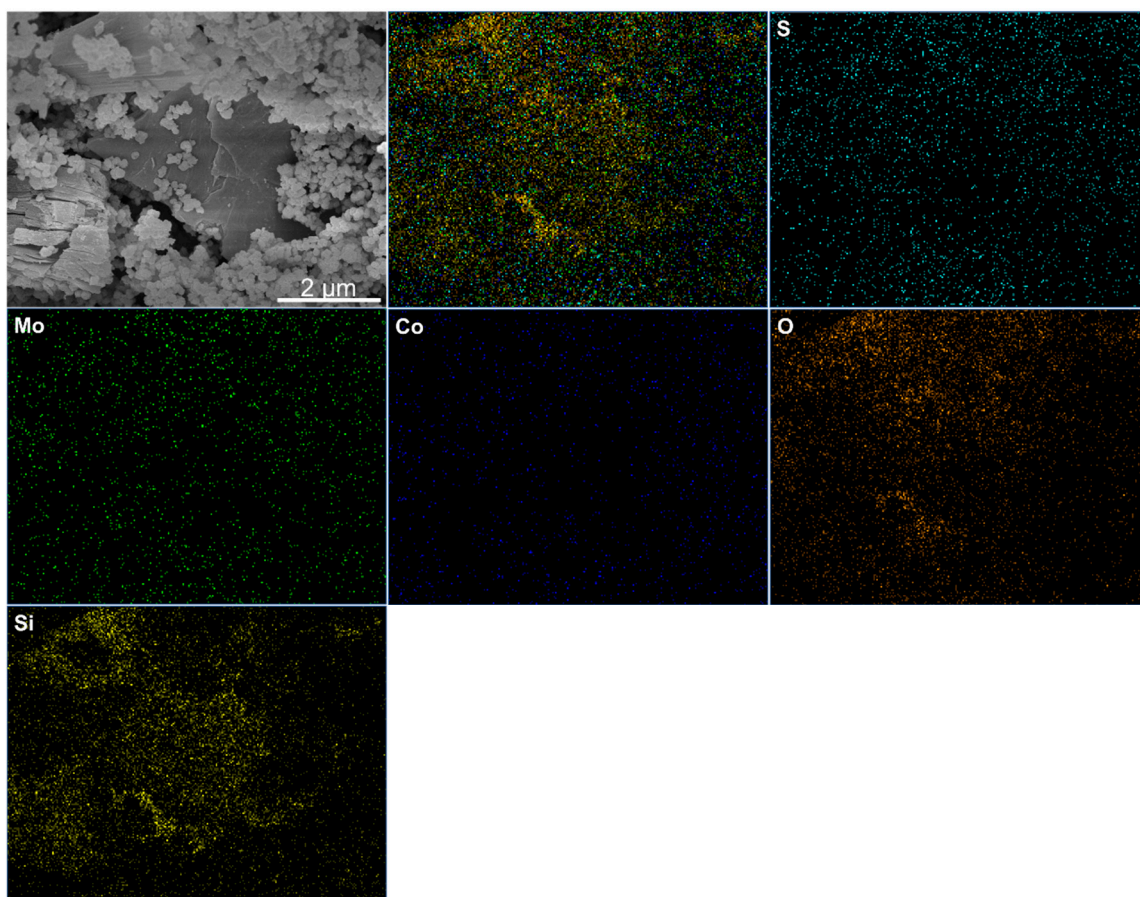

**Fig. S6:** Elemental mapping of CMSO@SiSh

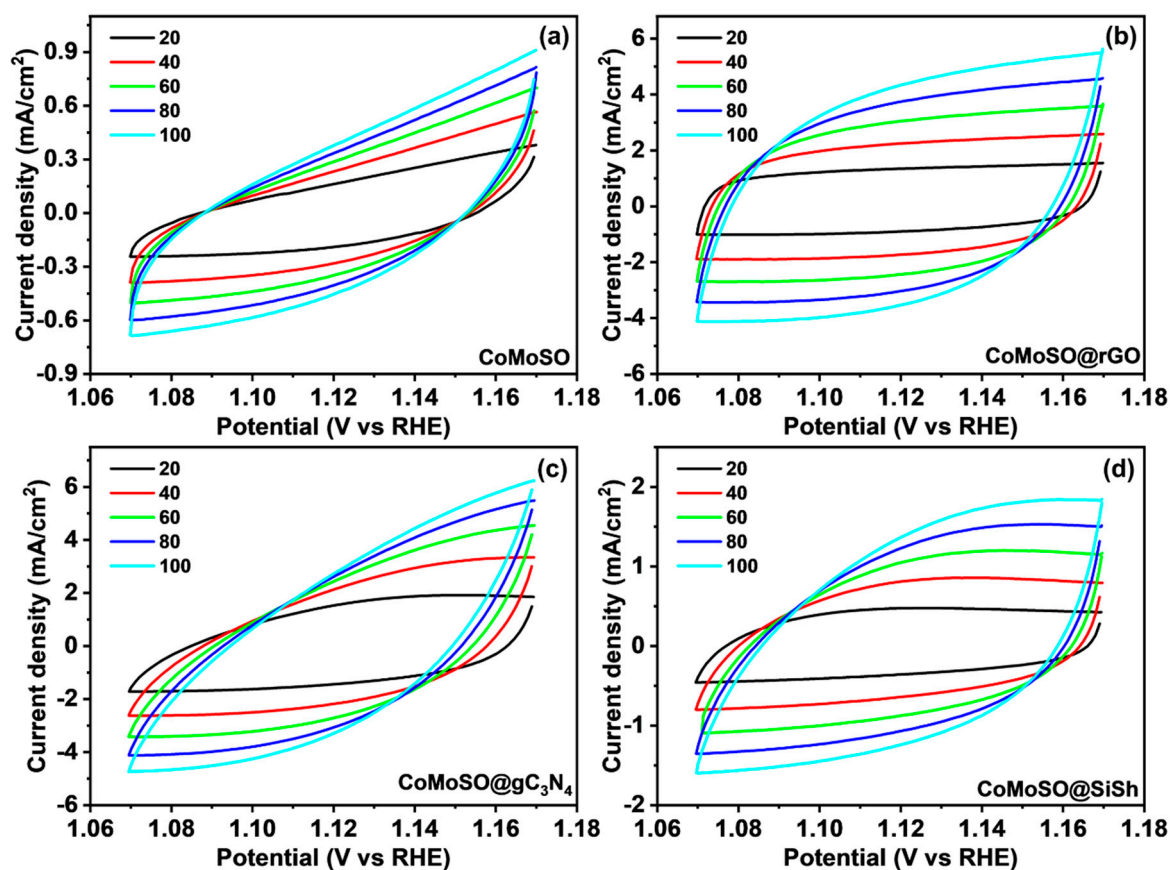

Fig. S7: Cyclic voltammetry curves at scan rates from 20 to 100 mV/s of prepared materials

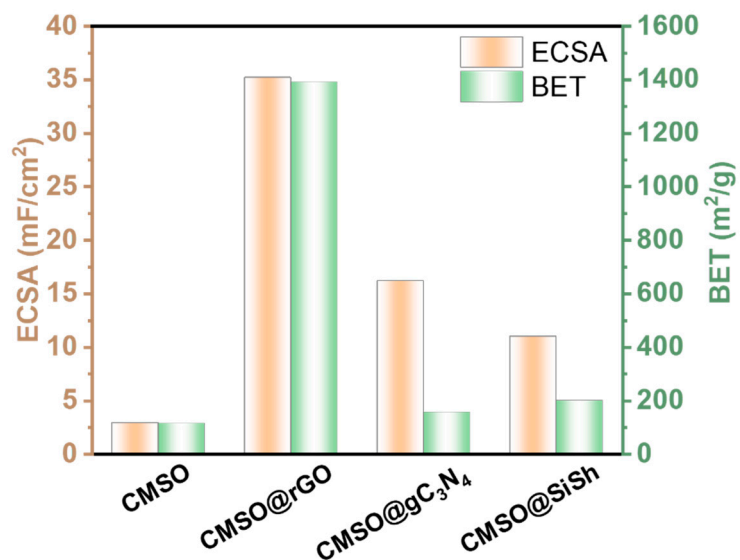

Fig. S8: Comparison of BET and ECSA of synthesized materials



**Table S1:** Comparison of OER activity in 1 M KOH of different electrocatalysts

| Materials                                          | Overpotential<br>At 10 mA/cm <sup>2</sup><br>(mV) | Tafel slope<br>(mA/dec) | Stability<br>(hour) | Reference        |
|----------------------------------------------------|---------------------------------------------------|-------------------------|---------------------|------------------|
| CoS <sub>2</sub> -MoS <sub>2</sub> hollow spheres  | 288                                               | 62.1                    | 10                  | [2]              |
| CoS <sub>2</sub> -MoS <sub>2</sub> nanosheet       | 266                                               | -                       | 24                  | [3]              |
| Cobalt Covalent Doping in MoS <sub>2</sub>         | 260                                               | 85                      | 11                  | [4]              |
| Co-Mo-S-2/NF                                       | 294                                               | 65.85                   | 120                 | [5]              |
| MoS <sub>2</sub> -CoS <sub>2</sub> @PCMT           | 215                                               | 93                      | 20                  | [6]              |
| N-CoS <sub>2</sub> /Graphene                       | 260                                               | 56.3                    | 8                   | [7]              |
| MoS <sub>2</sub> /NiCo <sub>2</sub> O <sub>4</sub> | 322                                               | 113                     | 12                  | [8]              |
| CMSO@rGO                                           | 259                                               | 85                      | 40                  | <b>This work</b> |

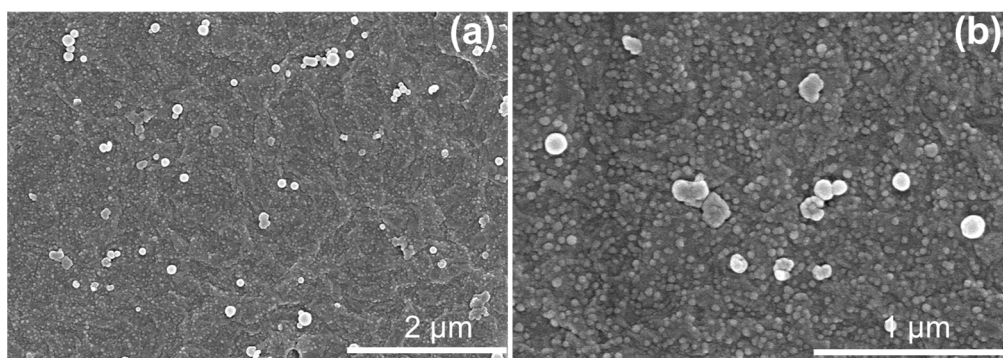**Fig. S9:** FESEM of CMSO@rGO at different magnifications after OER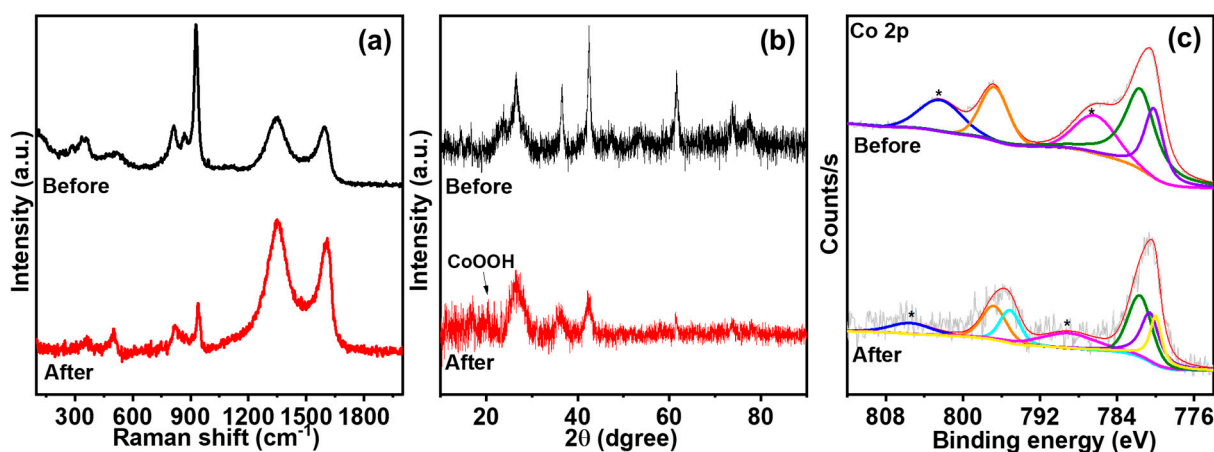**Fig. S10:** Comparison of (a) Raman spectrum, (b) XRD pattern, and (c) XPS of Co 2p of CMSO@rGO before and after OER

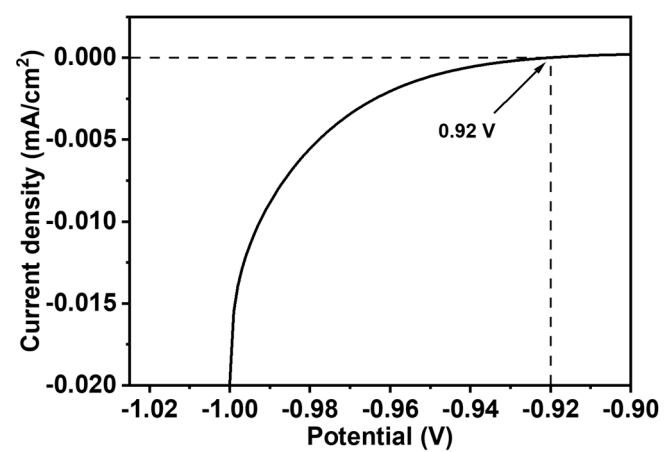

**Fig. S11:** Calibration of Hg/HgO electrode

## References

1. McCrory, C. C. L.; Jung, S.; Peters, J. C.; Jaramillo, T. F., Benchmarking Heterogeneous Electrocatalysts for the Oxygen Evolution Reaction. *Journal of the American Chemical Society* **2013**, *135* (45), 16977-16987.
2. Ganesan, V.; Kim, J., Multi-shelled CoS<sub>2</sub>–MoS<sub>2</sub> hollow spheres as efficient bifunctional electrocatalysts for overall water splitting. *International Journal of Hydrogen Energy* **2020**, *45* (24), 13290-13299.
3. Li, Y.; Wang, W.; Huang, B.; Mao, Z.; Wang, R.; He, B.; Gong, Y.; Wang, H., Abundant heterointerfaces in MOF-derived hollow CoS<sub>2</sub>–MoS<sub>2</sub> nanosheet array electrocatalysts for overall water splitting. *Journal of Energy Chemistry* **2021**, *57*, 99-108.
4. Xiong, Q.; Wang, Y.; Liu, P.-F.; Zheng, L.-R.; Wang, G.; Yang, H.-G.; Wong, P.-K.; Zhang, H.; Zhao, H., Cobalt Covalent Doping in MoS<sub>2</sub> to Induce Bifunctionality of Overall Water Splitting. *Advanced Materials* **2018**, *30* (29), 1801450.
5. Zhao, Z.-Y.; Li, F.-L.; Shao, Q.; Huang, X.; Lang, J.-P., Co-Modified MoS<sub>2</sub> Hybrids as Superior Bifunctional Electrocatalysts for Water Splitting Reactions: Integrating Multiple Active Components in One. *Advanced Materials Interfaces* **2019**, *6* (11), 1900372.
6. Yang, J.; Chai, C.; Jiang, C.; Liu, L.; Xi, J., MoS<sub>2</sub>–CoS<sub>2</sub> heteronanosheet arrays coated on porous carbon microtube textile for overall water splitting. *Journal of Power Sources* **2021**, *514*, 230580.
7. Tong, Y.; Sun, Q.; Chen, P.; Chen, L.; Fei, Z.; Dyson, P. J., Nitrogen-Incorporated Cobalt Sulfide/Graphene Hybrid Catalysts for Overall Water Splitting. *ChemSusChem* **2020**, *13* (18), 5112-5118.
8. Tao, B.; Yang, L.; Miao, F.; Zang, Y.; Chu, P. K., An MoS<sub>2</sub>/NiCo<sub>2</sub>O<sub>4</sub> composite supported on Ni foam as a bifunctional electrocatalyst for efficient overall water splitting. *Journal of Physics and Chemistry of Solids* **2021**, *150*, 109842.
